# Supplementary material for: 30-Minute Highly Multiplexed VaxArray Immunoassay for Pneumococcal Vaccine Antigen Characterization
Source: MDPI journal article supplement (doi:10.3390/vaccines10111964), 2022-11-19
Supplement: s1 [file s1]

**Supplemental Table S1:** Reactivity of conjugates using 23-Mix Primary Detection Label. Signal to blank ratios (S/BI) generated on the VaxArray 23-valent Pneumococcal Assay for monovalent Pfizer- and EuBiologics (EuB)-provided conjugates at 2 µg/mL using the 23-Mix Primary Detection Label. Columns represent each serotype-specific capture antibody, and rows represent each conjugate tested. Text in bold green shows S/BI>3 generated for the matched conjugate and capture antibody. Text in bold red shows S/BI<3 generated for the matched conjugate and capture antibody indicating low reactivity. Text in bold black shows S/BI>3 generated on off-target capture antibody indicating cross-reactivity.

|        |      | Serotype-Specific Microarray Capture Antibody |     |     |     |      |     |     |      |     |     |      |      |      |      |      |      |      |      |      |     |      |      |      |     |
|--------|------|-----------------------------------------------|-----|-----|-----|------|-----|-----|------|-----|-----|------|------|------|------|------|------|------|------|------|-----|------|------|------|-----|
|        |      | S1                                            | S2  | S3  | S4  | S5   | S6A | S6B | S7F  | S8  | S9N | S9V  | S10A | S12F | S14  | S15B | S17F | S18C | S19A | S19F | S20 | S22F | S23F | S33F |     |
| Pfizer | S1   | 5.8                                           | 1.0 | 1.0 | 1.0 | 0.9  | 1.0 | 0.9 | 0.9  | 0.9 | 1.0 | 1.0  | 0.9  | 1.0  | 1.0  | 1.0  | 1.0  | 0.9  | 0.9  | 1.1  | 1.1 | 1.1  | 1.1  | 1.2  |     |
| EuB    |      | 12.6                                          | 1.1 | 0.9 | 1.0 | 0.9  | 0.9 | 0.9 | 0.7  | 0.6 | 0.5 | 0.8  | 0.9  | 0.8  | 0.6  | 0.6  | 0.7  | 0.7  | 0.7  | 0.6  | 0.8 | 1.0  | 1.1  | 0.9  | 1.0 |
| Pfizer | S3   | 0.9                                           | 1.1 | 6.8 | 1.0 | 0.9  | 1.0 | 0.9 | 1.0  | 0.9 | 0.9 | 0.9  | 0.9  | 1.0  | 1.0  | 1.0  | 1.0  | 1.0  | 1.0  | 1.1  | 1.0 | 1.1  | 1.0  | 1.3  |     |
| EuB    |      | 1.1                                           | 1.1 | 7.7 | 1.2 | 1.1  | 1.0 | 1.1 | 1.1  | 1.1 | 1.0 | 1.0  | 1.0  | 1.1  | 1.1  | 1.2  | 1.2  | 1.3  | 1.2  | 1.1  | 1.0 | 1.1  | 1.7  | 1.1  | 1.3 |
| Pfizer | S4   | 1.0                                           | 1.3 | 1.0 | 9.3 | 1.1  | 1.1 | 1.0 | 1.0  | 1.0 | 1.0 | 1.0  | 1.0  | 1.1  | 1.0  | 1.1  | 1.0  | 1.1  | 1.1  | 1.1  | 1.2 | 1.1  | 1.1  | 1.3  |     |
| EuB    |      | 1.2                                           | 1.3 | 1.3 | 9.9 | 1.2  | 1.2 | 1.2 | 1.4  | 1.1 | 1.1 | 1.1  | 1.1  | 1.2  | 1.2  | 1.1  | 1.4  | 1.4  | 1.3  | 1.1  | 1.1 | 1.3  | 1.1  | 1.2  | 1.4 |
| Pfizer | S5   | 1.0                                           | 1.1 | 1.0 | 0.9 | 11.8 | 1.0 | 0.9 | 0.9  | 1.2 | 1.0 | 1.0  | 1.0  | 1.0  | 1.0  | 1.0  | 1.0  | 0.9  | 0.9  | 1.0  | 1.1 | 1.1  | 1.1  | 1.1  |     |
| EuB    |      | 1.2                                           | 1.3 | 1.2 | 1.3 | 12.9 | 1.3 | 1.2 | 1.2  | 1.5 | 1.1 | 1.1  | 1.1  | 1.2  | 1.2  | 1.2  | 1.3  | 1.3  | 1.3  | 1.2  | 1.2 | 1.1  | 1.2  | 1.1  | 1.3 |
| Pfizer | S6A  | 1.1                                           | 1.0 | 1.0 | 0.9 | 0.9  | 8.3 | 1.0 | 0.9  | 0.9 | 0.9 | 1.0  | 1.1  | 1.0  | 1.0  | 1.0  | 1.0  | 0.9  | 0.9  | 0.9  | 1.1 | 1.2  | 1.1  | 1.1  | 1.1 |
| EuB    |      | 1.1                                           | 1.2 | 1.2 | 1.2 | 1.1  | 7.7 | 1.1 | 1.1  | 1.0 | 1.0 | 1.0  | 1.1  | 1.0  | 1.0  | 1.0  | 1.2  | 1.1  | 1.1  | 1.0  | 1.0 | 1.0  | 1.0  | 1.0  | 1.1 |
| Pfizer | S6B  | 1.1                                           | 1.2 | 1.1 | 1.1 | 1.1  | 1.2 | 8.9 | 1.1  | 1.1 | 1.1 | 1.0  | 1.0  | 1.0  | 1.1  | 1.2  | 1.1  | 1.2  | 1.1  | 1.0  | 1.1 | 1.0  | 1.0  | 1.2  |     |
| EuB    |      | 1.1                                           | 1.2 | 1.1 | 1.1 | 1.0  | 1.2 | 8.7 | 1.1  | 1.0 | 1.1 | 1.0  | 1.0  | 1.0  | 1.0  | 1.0  | 1.1  | 1.1  | 1.2  | 1.0  | 1.0 | 1.2  | 1.0  | 1.1  | 1.2 |
| Pfizer | S7F  | 1.0                                           | 1.0 | 0.9 | 1.1 | 1.0  | 1.1 | 1.0 | 9.9  | 1.0 | 1.0 | 1.0  | 1.1  | 1.0  | 1.0  | 1.0  | 1.0  | 1.0  | 1.1  | 1.0  | 1.2 | 1.0  | 1.0  | 1.2  |     |
| EuB    |      | 1.1                                           | 1.1 | 1.2 | 1.2 | 1.1  | 1.2 | 1.1 | 13.6 | 1.1 | 1.0 | 1.0  | 1.0  | 1.1  | 1.0  | 1.0  | 1.1  | 1.1  | 1.3  | 1.0  | 1.0 | 1.0  | 1.0  | 0.9  | 1.0 |
| Pfizer | S9V  | 1.0                                           | 1.1 | 0.9 | 1.0 | 1.0  | 1.1 | 1.0 | 1.0  | 1.0 | 1.0 | 14.3 | 1.2  | 1.0  | 1.0  | 1.0  | 1.0  | 1.0  | 1.1  | 1.0  | 1.0 | 1.0  | 0.9  | 1.2  |     |
| EuB    |      | 1.3                                           | 1.8 | 1.7 | 1.9 | 1.2  | 1.4 | 1.3 | 1.1  | 1.2 | 1.3 | 10.3 | 1.3  | 1.4  | 1.2  | 1.7  | 1.8  | 1.6  | 1.1  | 1.1  | 1.9 | 1.3  | 2.0  | 2.0  |     |
| Pfizer | S14  | 1.6                                           | 1.1 | 0.9 | 0.9 | 1.0  | 1.1 | 1.0 | 1.0  | 1.0 | 1.0 | 1.0  | 1.1  | 1.1  | 11.8 | 1.0  | 1.0  | 1.1  | 1.1  | 1.0  | 1.1 | 1.0  | 0.8  | 1.3  |     |
| EuB    |      | 2.0                                           | 2.2 | 1.7 | 2.2 | 1.3  | 1.6 | 1.5 | 1.2  | 1.3 | 1.4 | 1.3  | 1.5  | 1.4  | 14.9 | 2.1  | 2.0  | 1.9  | 1.3  | 1.1  | 2.1 | 1.4  | 2.1  | 2.1  |     |
| Pfizer | S18C | 1.0                                           | 1.0 | 0.9 | 1.0 | 1.0  | 1.0 | 1.0 | 1.0  | 0.9 | 1.0 | 1.0  | 1.0  | 1.0  | 1.0  | 1.0  | 1.0  | 1.0  | 1.1  | 1.0  | 1.0 | 1.0  | 0.9  | 1.1  |     |
| EuB    |      | 1.4                                           | 2.0 | 1.6 | 1.9 | 1.3  | 1.5 | 1.4 | 1.1  | 1.1 | 1.4 | 1.2  | 1.3  | 1.4  | 1.2  | 1.9  | 2.0  | 13.7 | 1.2  | 1.2  | 1.8 | 1.3  | 2.0  | 2.1  |     |
| Pfizer | S19A | 1.0                                           | 0.9 | 0.8 | 0.8 | 1.0  | 0.9 | 1.0 | 0.9  | 1.0 | 1.0 | 1.0  | 1.0  | 1.0  | 1.0  | 0.9  | 0.9  | 1.0  | 9.3  | 1.0  | 0.9 | 1.0  | 5.9  | 1.0  |     |
| EuB    |      | 1.4                                           | 2.0 | 1.7 | 2.0 | 1.3  | 1.5 | 1.4 | 1.1  | 1.3 | 1.4 | 1.3  | 1.3  | 1.4  | 1.2  | 1.7  | 1.8  | 1.7  | 16.1 | 1.1  | 1.8 | 1.3  | 1.8  | 1.8  |     |
| Pfizer | S19F | 1.0                                           | 0.9 | 1.0 | 1.0 | 0.9  | 0.9 | 1.0 | 1.0  | 0.9 | 1.0 | 0.9  | 1.1  | 1.1  | 0.9  | 1.2  | 1.1  | 1.1  | 1.0  | 12.7 | 1.3 | 1.0  | 1.1  | 1.3  |     |
| EuB    |      | 1.5                                           | 2.2 | 1.9 | 2.1 | 1.3  | 1.6 | 1.4 | 1.2  | 1.2 | 1.5 | 1.3  | 1.4  | 1.4  | 1.2  | 1.7  | 1.7  | 1.9  | 1.2  | 16.1 | 1.9 | 1.4  | 1.9  | 1.9  |     |
| EuB    | S22F | 0.9                                           | 0.9 | 0.9 | 0.9 | 0.9  | 0.9 | 0.9 | 0.9  | 0.9 | 0.9 | 0.9  | 0.9  | 0.9  | 0.9  | 0.8  | 0.9  | 0.9  | 0.9  | 0.9  | 0.9 | 10.5 | 0.9  | 0.9  |     |
| Pfizer | S23F | 0.9                                           | 0.8 | 0.9 | 0.9 | 0.9  | 1.0 | 1.0 | 0.9  | 0.9 | 1.0 | 0.9  | 0.9  | 1.0  | 0.9  | 1.1  | 1.2  | 1.1  | 1.0  | 0.9  | 1.1 | 1.0  | 1.2  | 1.2  |     |
| EuB    |      | 0.9                                           | 1.0 | 1.0 | 0.9 | 0.9  | 0.9 | 0.9 | 0.9  | 0.9 | 0.8 | 0.9  | 0.9  | 0.9  | 1.0  | 0.9  | 0.9  | 0.9  | 0.9  | 0.9  | 0.9 | 0.9  | 3.3  | 1.0  |     |



**Supplemental Table S3:** Analytical sensitivity and working range for 13-valent Pfizer conjugates and 14-valent EuBiologics (EuB) conjugates with both 23-Mix and anti-CRM197 Primary Detection Labels. “NA”: not applicable due to low signal on S18C capture.

| Serotype | Supplier | Approx. LLOQ (ng/mL) |                   | Approx ULOQ (µg/mL) |                   | Working Range (x-fold) |                   |
|----------|----------|----------------------|-------------------|---------------------|-------------------|------------------------|-------------------|
|          |          | 23-Mix Label         | anti-CRM197 Label | 23-Mix Label        | anti-CRM197 Label | 23-Mix Label           | anti-CRM197 Label |
| 1        | Pfizer   | 2.4                  | 8.6               | 0.4                 | 0.8               | 181                    | 95                |
|          | EuB      | 3.7                  | 13.5              | 0.8                 | 0.8               | 226                    | 59                |
| 3        | Pfizer   | 4.3                  | 6.7               | 0.6                 | 0.7               | 144                    | 97                |
|          | EuB      | 28.4                 | 14.8              | 1.8                 | 1.6               | 64                     | 109               |
| 4        | Pfizer   | 2.5                  | 4.2               | 0.5                 | 0.5               | 204                    | 123               |
|          | EuB      | 8.5                  | 17.7              | 0.8                 | 1.1               | 100                    | 62                |
| 5        | Pfizer   | 8.6                  | 7.8               | 0.8                 | 0.8               | 94                     | 106               |
|          | EuB      | 43.0                 | 98.9              | 1.7                 | 1.7               | 39                     | 17                |
| 6A       | Pfizer   | 47.3                 | 27.4              | 2.4                 | 1.9               | 51                     | 71                |
|          | EuB      | 45.5                 | 11.7              | 2.0                 | 1.4               | 45                     | 118               |
| 6B       | Pfizer   | 76.3                 | 26.6              | 6.6                 | 3.5               | 86                     | 130               |
|          | EuB      | 78.0                 | 12.8              | 2.5                 | 1.9               | 31                     | 148               |
| 7F       | Pfizer   | 14.4                 | 38.2              | 3.0                 | 3.3               | 207                    | 87                |
|          | EuB      | 20.2                 | 39.7              | 1.8                 | 2.2               | 90                     | 55                |
| 9V       | Pfizer   | 29.8                 | 8.9               | 1.7                 | 1.2               | 57                     | 129               |
|          | EuB      | 190.7                | 14.3              | 2.5                 | 1.6               | 13                     | 110               |
| 14       | Pfizer   | 2.5                  | 43.8              | 1.0                 | 1.7               | 385                    | 40                |
|          | EuB      | 8.2                  | 41.4              | 1.1                 | 2.0               | 129                    | 49                |
| 18C      | Pfizer   | NA                   | 8.9               | NA                  | 0.6               | NA                     | 69                |
|          | EuB      | 18.0                 | 23.8              | 2.1                 | 1.5               | 115                    | 63                |
| 19A      | Pfizer   | 23.9                 | 7.8               | 1.6                 | 1.1               | 66                     | 146               |
|          | EuB      | 49.0                 | 14.5              | 1.9                 | 1.5               | 39                     | 104               |
| 19F      | Pfizer   | 13.6                 | 27.3              | 1.4                 | 1.1               | 106                    | 41                |
|          | EuB      | 15.5                 | 30.7              | 1.1                 | 1.3               | 72                     | 44                |
| 22F      | EuB      | 14.1                 | 29.0              | 1.8                 | 1.3               | 127                    | 43                |
| 23F      | Pfizer   | 26.2                 | 6.1               | 1.5                 | 1.0               | 56                     | 167               |
|          | EuB      | 128.1                | 9.1               | 2.6                 | 1.2               | 21                     | 127               |

**Supplemental Table S4:** Accuracy and precision for EuBiologics 15-valent drug product with and without sodium citrate desorption using 23-Mix Primary Detection Label. Text in red indicates values not within 80-120% recovery and < 20% RSD.

| Serotype | Expected Conc. (µg/mL) | No Desorption         |                  | Desorbed              |                  |
|----------|------------------------|-----------------------|------------------|-----------------------|------------------|
|          |                        | Accuracy (% Recovery) | Precision (%RSD) | Accuracy (% Recovery) | Precision (%RSD) |
| S1       | 0.18                   | 116%                  | 8%               | 118%*                 | 14%*             |
| S3       | 0.16                   | 104%                  | 10%              | 110%                  | 13%              |
| S4       | 0.18                   | 79%                   | 24%              | 100%*                 | 12%*             |
| S5       | 0.32                   | 109%                  | 19%              | 83%                   | 19%              |
| S6A      | 0.28                   | 94%                   | 8%               | 97%                   | 13%              |
| S6B      | 0.67                   | 96%                   | 9%               | 105%                  | 11%              |
| S7F      | 0.20                   | 92%                   | 11%              | 104%                  | 15%              |
| S9V      | 0.20                   | 115%                  | 12%              | 102%                  | 19%              |
| S14      | 0.13                   | 94%                   | 17%              | 88%                   | 7%               |
| S18C     | 0.12                   | 26%                   | 6%               | 84%                   | 11%              |
| S19A     | 0.25                   | 93%                   | 5%               | 101%                  | 11%              |
| S19F     | 0.13                   | 113%                  | 27%              | 91%                   | 6%               |
| S22F     | 0.24                   | 97%                   | 8%               | 111%                  | 11%              |
| S23F     | 0.27                   | 111%                  | 65%              | 106%                  | 9%               |
| Overall  |                        | 96±23%                | 16±16%           | 98±10%                | 12±4%            |

\*: Data is from 400ms exposure, Std 1 signal saturated at 700ms.

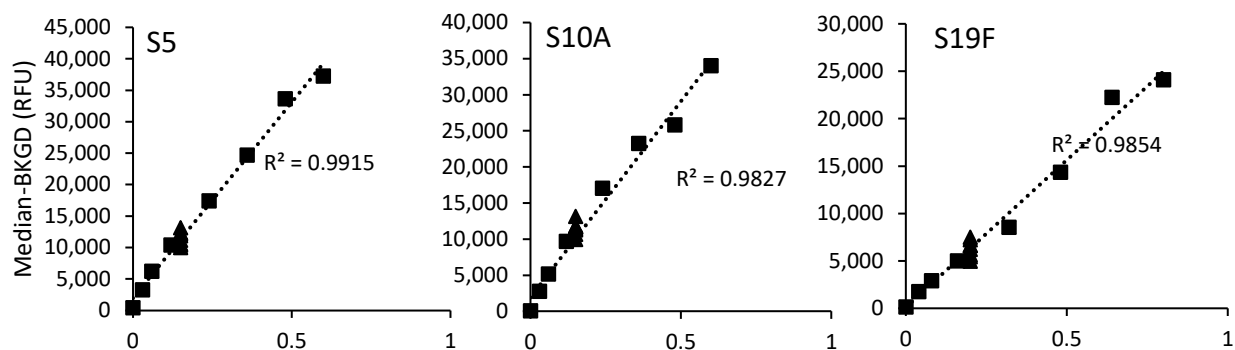

**Supplemental Figure S1.** Signal response (median signal with background signal subtracted) of samples measured (triangles) and matched standard (squares) for Serotype 5, 10A and 19F in 23-valent Pfizer native sample. Linear fits are dotted lines with the associated correlation coefficient indicated.

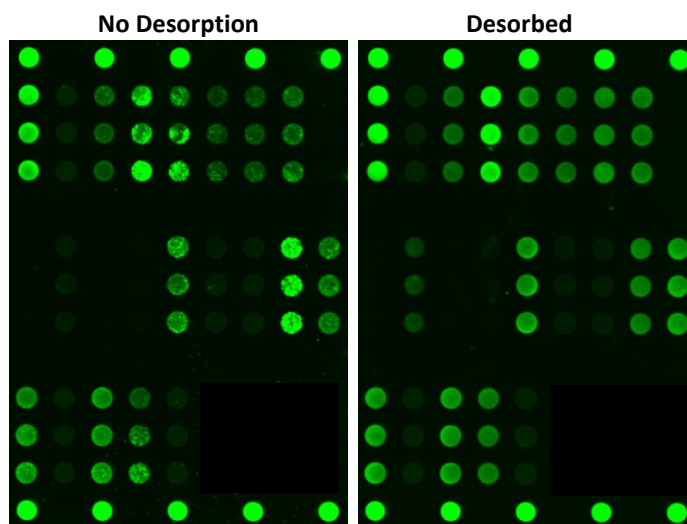

**Supplemental Figure S2.** Representative fluorescence microarray images of samples under quantification before desorption (left) and post-desorption (right) showing improved microarray spot morphologies.
