# Supplementary material for: 30-Minute Highly Multiplexed VaxArray Immunoassay for Pneumococcal Vaccine Antigen Characterization
Source: MDPI journal article supplement (doi:10.3390/vaccines10111964), 2022-11-19
Supplement: s1 [file s1]

## Legends of Figures and Tables

**Supplemental Figure S1.** Signal response (median signal with background signal subtracted) of samples measured (triangles) and matched standard (squares) for Serotype 5, 10A and 19F in 23-valent Pfizer native sample. Linear fits are dotted lines with the associated correlation efficient indicated.

**Supplemental Figure S2.** Representative fluorescence microarray images of samples under quantification before desorption (left) and post-desorption (right) showing improved microarray spot morphologies.

**Supplemental Table S1:** Reactivity of conjugates using 23-Mix Primary Detection Label. Signal to blank ratios (S/BI) generated on the VaxArray 23-valent Pneumococcal Assay for monovalent Pfizer- and EuBiologics (EuB)-provided conjugates at 2 µg/mL using the 23-Mix Primary Detection Label. Columns represent each serotype-specific capture antibody, and rows represent each conjugate tested. Text in bold green shows  $S/BI > 3$  generated for the matched conjugate and capture antibody. Text in bold red shows  $S/BI < 3$  generated for the matched conjugate and capture antibody indicating low reactivity. Text in bold black shows  $S/BI > 3$  generated on off-target capture antibody indicating cross-reactivity.

**Supplemental Table S2:** Reactivity of conjugates using anti-CRM197 Primary Detection Label. Signal to blank ratios (S/BI) generated on the VaxArray 23-valent Pneumococcal Assay for monovalent Pfizer- and EuBiologics (EuB)-provided conjugates at 2 µg/mL labeled with anti-CRM197 Primary Detection Label. Columns represent each serotype-specific capture antibody, and rows represent each conjugate tested. Text in bold green shows  $S/BI > 3$  generated for the matched conjugate and capture antibody. Text in bold black shows  $S/BI > 3$  generated on off-target capture antibody indicating cross-reactivity.

**Supplemental Table S3:** Analytical sensitivity and working range for 13-valent Pfizer conjugates and 14-valent EuBiologics (EuB) conjugates with both 23-Mix and anti-CRM197 Primary Detection Labels. “NA”: not applicable due to low signal on S18C capture.

**Supplemental Table S4:** Accuracy and precision for EuBiologics 15-valent drug product with and without sodium citrate desorption using 23-Mix Primary Detection Label. Text in red indicates values not within 80-120% recovery and < 20% RSD.
