# Supplementary material for: 30-Minute Highly Multiplexed VaxArray Immunoassay for Pneumococcal Vaccine Antigen Characterization
Source: Vaccines (Basel). 2022 Nov 19;10(11):1964. doi: 10.3390/vaccines10111964 (PMC9693921; doi:10.3390/vaccines10111964)
Supplement: Supplementary file 1 [file vaccines-10-01964-s001.zip]

Archive with 9 entries (9 files):
- 2022-11-18-Pneumo Manuscript_Supplemental FIGURES and tables.pdf
- 2022-11-18-Pneumo Manuscript_Supplemental FIGURES and tables.pptx
- Legends of Supplemental Figures and Tables.pdf
- Supplemental Figure S1.png
- Supplemental Figure S2.png
- Supplemental Table S1.png
- Supplemental Table S2.png
- Supplemental Table S3.png
- Supplemental Table S4.png
